# Supplementary material
Source: HighWire-hosted journal article supplement (https://bmjopen.bmj.com/content/7/9/e016453)
Supplement: inline-supplementary-material-2 [file inline-supplementary-material-2.pdf]

## The MultiCath Study (LREC: 13/LO/1511) - Urinary Tract Infection (UTI) signs and symptoms

Participant study ID: \_\_\_\_\_ Date of completion: \_\_\_\_\_ Completed by (interviewer name): \_\_\_\_\_

Tick all the signs and symptoms that refer to your experience of UTI:

| Signs and symptoms                                              |                          |       |                                  |                                               |                 |                    |                            |                  |              |                           |                 |                                     |            |
|-----------------------------------------------------------------|--------------------------|-------|----------------------------------|-----------------------------------------------|-----------------|--------------------|----------------------------|------------------|--------------|---------------------------|-----------------|-------------------------------------|------------|
|                                                                 | Autonomic<br>dysreflexia | Fever | Kidney<br>/Bladder<br>discomfort | Increased<br>Bladder activity<br>(spasticity) | Feeling<br>sick | Sense of<br>unease | Increased<br>catheterising | Feeling<br>tired | Incontinence | Foul<br>smelling<br>urine | Cloudy<br>urine | White<br>blood<br>cells in<br>urine | Haematuria |
| Tick if yes                                                     |                          |       |                                  |                                               |                 |                    |                            |                  |              |                           |                 |                                     |            |
| Circle how often you experience each symptom when you get a UTI |                          |       |                                  |                                               |                 |                    |                            |                  |              |                           |                 |                                     |            |
| Always                                                          |                          |       |                                  |                                               |                 |                    |                            |                  |              |                           |                 |                                     |            |
| Sometimes                                                       |                          |       |                                  |                                               |                 |                    |                            |                  |              |                           |                 |                                     |            |
| Rarely                                                          |                          |       |                                  |                                               |                 |                    |                            |                  |              |                           |                 |                                     |            |

Which of the above symptoms they mentioned would cause them to seek help from GP? \_\_\_\_\_

Which of the above symptoms they mentioned would cause them to take antibiotics (patients with own supply)? \_\_\_\_\_

How often does the patient have a UTI? (tick which applies)

| Once a week | Once a month | Every other month | Twice a year | Once a year | Less than once a year |
|-------------|--------------|-------------------|--------------|-------------|-----------------------|
|             |              |                   |              |             |                       |

How many times has the patient been to their GP in the last year for a UTI? \_\_\_\_\_

How many times has the patient taken antibiotics in the last year for a UTI? \_\_\_\_\_

Have you been referred to a specialist in the last year for UTI symptoms? (eg. Urologist) \_\_\_\_\_
